# Supplementary figures and images for: Unconstrained dynamic gel swelling generates transient surface deformations
Source: Royal Society of Chemistry journal article supplement (doi:10.1039/d4sm00762j), 2024-01-01

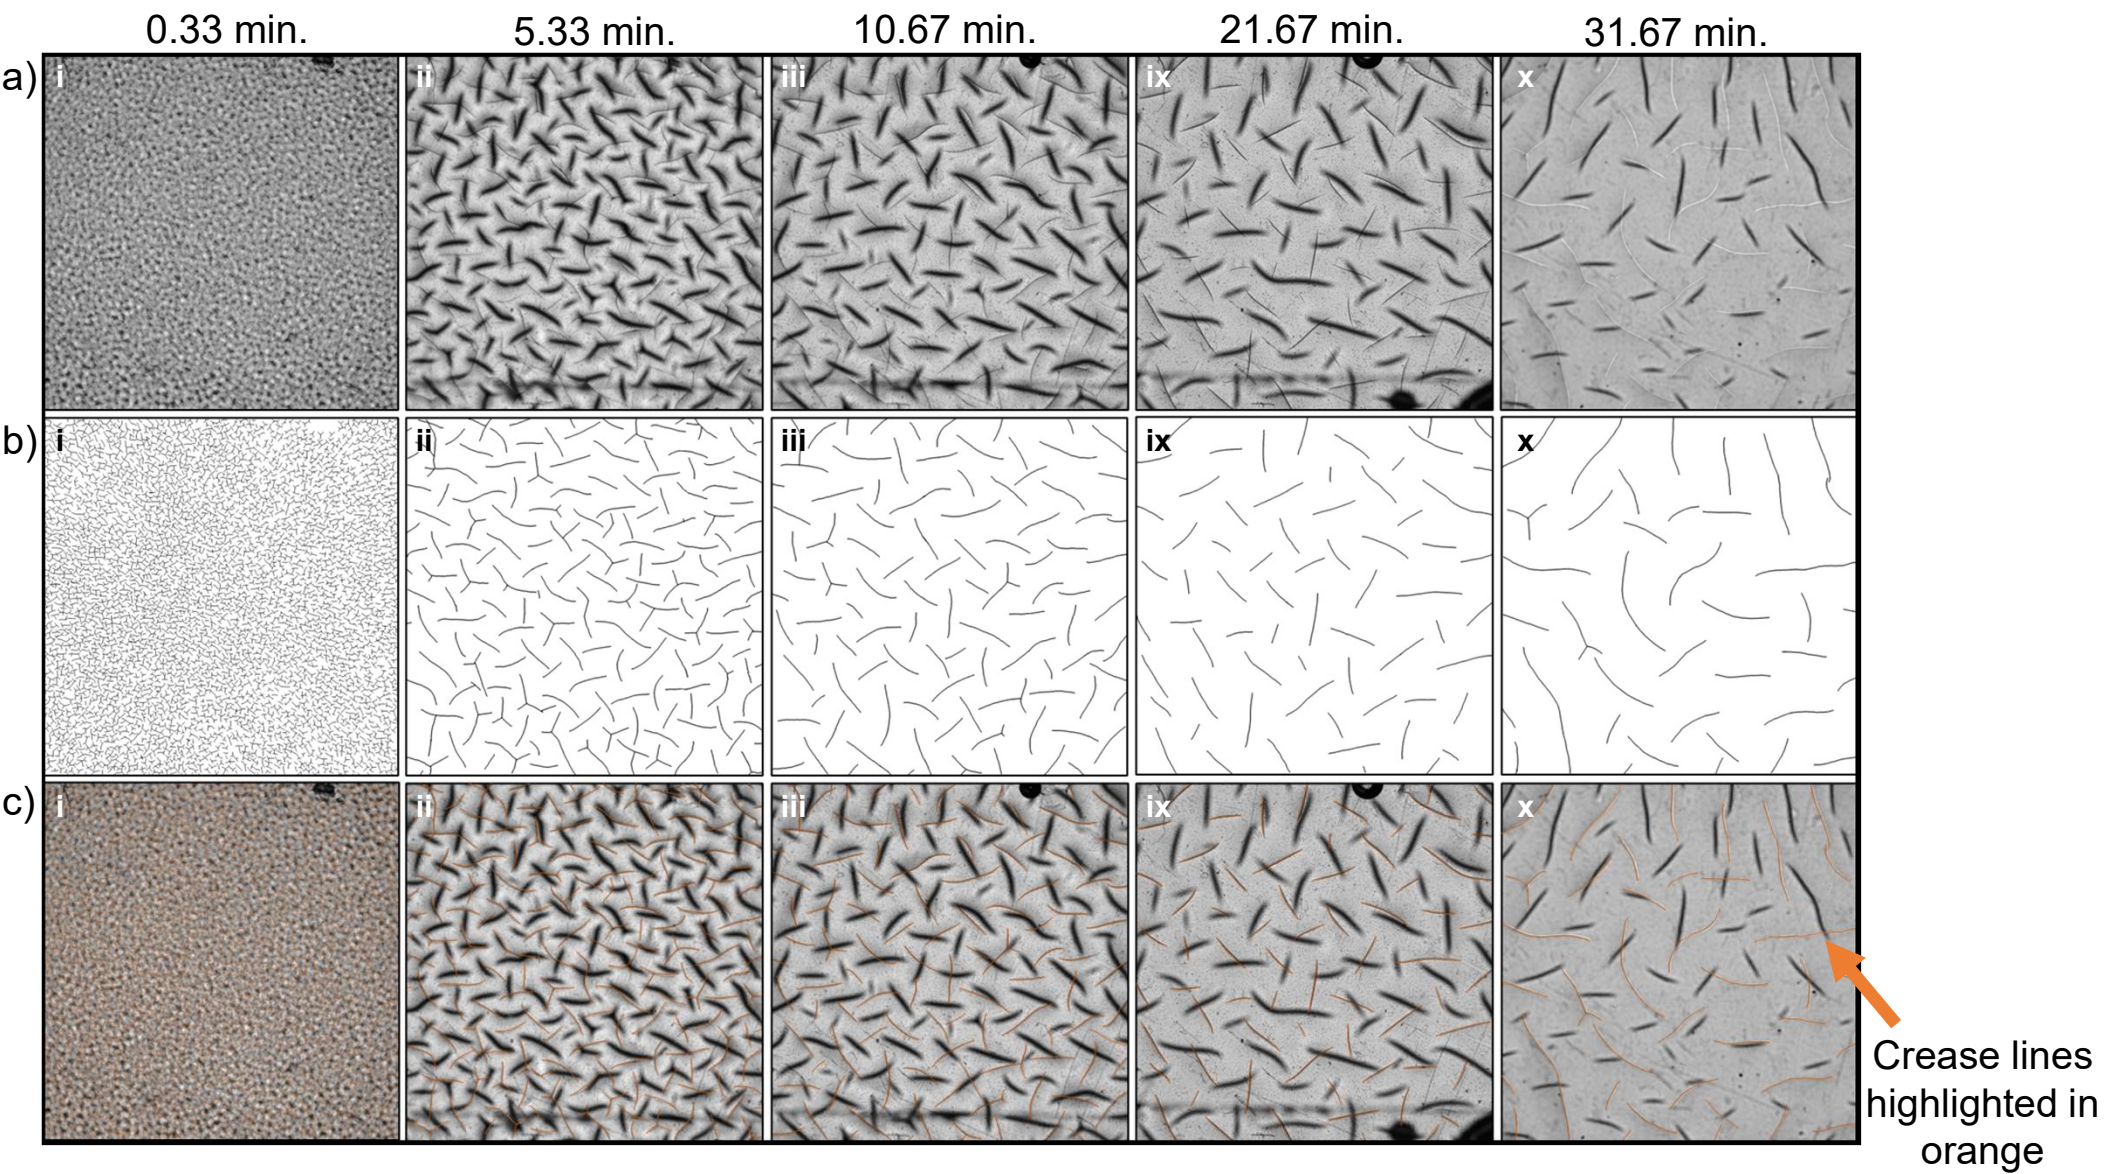

Supplement: d4sm00762j1.pdf [file d4sm00762j1.pdf]

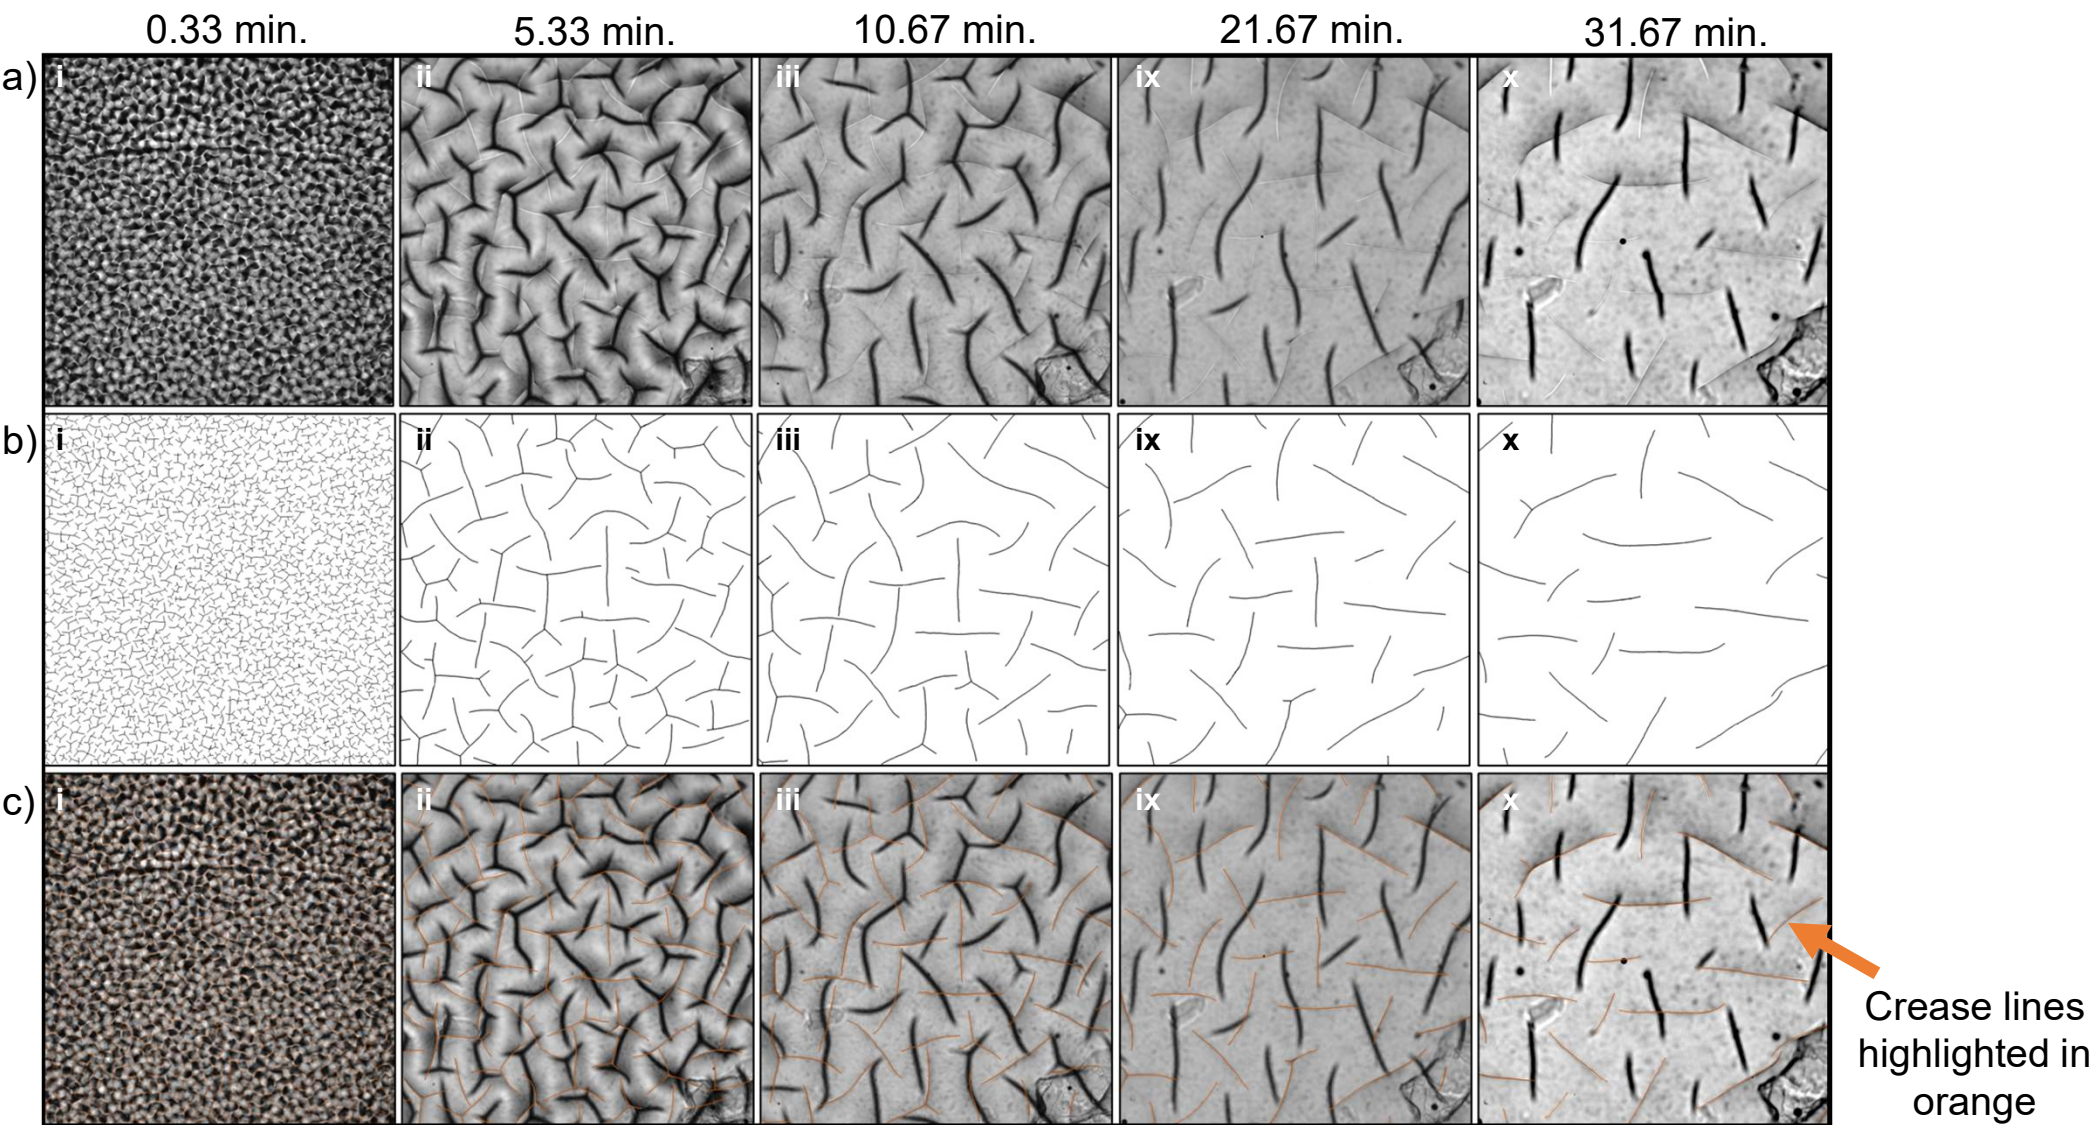

Supplement: d4sm00762j2.pdf [file d4sm00762j2.pdf]
